# Supplementary material for: Year-Long Assessment of Soil Nematode Diversity and Root Inhibition-Indicator Nematode Genera in Rice Fields
Source: MDPI journal article supplement (doi:10.3390/biology11111572), 2022-10-26
Supplement: s1 [file s1]

# **Year-Long Assessment of Soil Nematode Diversity and Root Inhibition-Indicator Nematode Genera in Rice Fields**

**Rawhat Un Nisa <sup>1</sup>, Anees Un Nisa <sup>2</sup>, Ali Ahmed Hroobi <sup>3</sup>, Ali Asghar Shah <sup>1</sup> and Aadil Yousuf Tantray <sup>4,5,\*</sup>**

<sup>1</sup> Nematode Biodiversity & Genomics Research Lab, BGSB University, Rajouri, 185234, India

<sup>2</sup> Mycology & Plant Pathology Lab, Department of Botany, University of Kashmir, Srinagar, 190006, India

<sup>3</sup> Department of Biology, College of Sciences in Almandaq, Al-Baha University, Al-Baha, 65779-7738, Saudi Arabia

<sup>4</sup> Department of Botany, Aligarh Muslim University, Aligarh, 202002, India

<sup>5</sup> School of Biological Sciences, University of Aberdeen, Aberdeen, AB243UU, UK

\*Correspondence: a.y.tantray@gmail.com; Tel.: +91 8493082705

**Supplementary Table S1:** Datasets of frequency, density, and their relative data of nematode genera during the three seasons in the soil of the rice fields.

**A. Before plantation (season I)**

| Nematode genera          | Frequency | Relative frequency | Absolute frequency | Density | Relative density | Mean density | Nematode no. | c-p values |
|--------------------------|-----------|--------------------|--------------------|---------|------------------|--------------|--------------|------------|
| <b>Plant-parasitic</b>   |           |                    |                    |         |                  |              |              |            |
| <i>Psilenchus</i>        | 10.00     | 3.70               | 25.00              | 80.00   | 130.93           | 2.00         | 12.00        | 2          |
| <i>Radopholus</i>        | 6.00      | 2.22               | 15.00              | 65.00   | 106.38           | 1.63         | 8.00         | 2          |
| <i>Longidorus</i> *      | 9.00      | 3.33               | 22.50              | 73.00   | 119.48           | 1.83         | 13.00        | 5          |
| <i>Rotylenchus</i>       | 0.00      | 0.00               | 0.00               | 0.00    | 0.00             | 0.00         | 0.00         | 0          |
| <i>Criconemoides</i> \$  | 2.00      | 0.74               | 5.00               | 22.00   | 36.01            | 0.55         | 5.00         | 3          |
| <i>Ditylenchus</i>       | 5.00      | 1.85               | 12.50              | 46.00   | 75.29            | 1.15         | 8.00         | 2          |
| <i>Meloidogyne</i> *     | 7.00      | 2.59               | 17.50              | 53.00   | 86.74            | 1.33         | 8.00         | 3          |
| <i>Helicotylenchus</i>   | 5.00      | 1.85               | 12.50              | 45.00   | 73.65            | 1.13         | 6.00         | 3          |
| <i>Heterodera</i> *      | 8.00      | 2.96               | 20.00              | 74.00   | 121.11           | 1.85         | 13.00        | 3          |
| <i>Hirschmanniella</i> * | 5.00      | 1.85               | 12.50              | 50.00   | 81.83            | 1.25         | 7.00         | 3          |
| <i>Hoplolaimus</i>       | 0.00      | 0.00               | 0.00               | 0.00    | 0.00             | 0.00         | 0.00         | 0          |
| <i>Globodera</i>         | 3.00      | 1.11               | 7.50               | 32.00   | 52.37            | 0.80         | 5.00         | 3          |

|                           |       |      |       |        |        |      |       |   |
|---------------------------|-------|------|-------|--------|--------|------|-------|---|
| <i>Tylenchus*</i>         | 9.00  | 3.33 | 22.50 | 85.00  | 139.12 | 2.13 | 15.00 | 2 |
| <i>Paratylenchus</i>      | 0.00  | 0.00 | 0.00  | 0.00   | 0.00   | 0.00 | 0.00  | 0 |
| <i>Pratylenchus</i>       | 4.00  | 1.48 | 10.00 | 48.00  | 78.56  | 1.20 | 6.00  | 3 |
| <i>Hexatylenchus</i>      | 0.00  | 0.00 | 0.00  | 0.00   | 0.00   | 0.00 | 0.00  | 0 |
| <i>Tylenchorhynchus</i>   | 6.00  | 2.22 | 15.00 | 69.00  | 112.93 | 1.73 | 8.00  | 2 |
| <i>Xiphinema</i>          | 0.00  | 0.00 | 0.00  | 0.00   | 0.00   | 0.00 | 0.00  | 0 |
| <b>Bacteriovores</b>      |       |      |       |        |        |      |       |   |
| <i>Acrobelus</i>          | 0.00  | 0.00 | 0.00  | 0.00   | 0.00   | 0.00 | 0.00  | 0 |
| <i>Cephalobus*</i>        | 1.00  | 0.37 | 2.50  | 15.00  | 24.55  | 0.38 | 4.00  | 2 |
| <i>Eucephalobus</i>       | 14.00 | 5.19 | 35.00 | 83.00  | 135.84 | 2.08 | 18.00 | 2 |
| <i>Rhabdolaimus</i> \$    | 3.00  | 1.11 | 7.50  | 25.00  | 40.92  | 0.63 | 7.00  | 1 |
| <i>Diplogaster</i>        | 17.00 | 6.30 | 42.50 | 112.00 | 183.31 | 2.80 | 25.00 | 1 |
| <i>Diploscapter</i>       | 14.00 | 5.19 | 35.00 | 109.00 | 178.40 | 2.73 | 21.00 | 1 |
| <i>Rhabditis</i>          | 12.00 | 4.44 | 30.00 | 104.00 | 170.21 | 2.60 | 16.00 | 1 |
| <i>Teratorhabditis</i> \$ | 8.00  | 2.96 | 20.00 | 86.00  | 140.75 | 2.15 | 13.00 | 1 |
| <i>Mesorhabditis</i>      | 13.00 | 4.81 | 32.50 | 104.00 | 170.21 | 2.60 | 19.00 | 1 |
| <i>Cuticularia*</i>       | 12.00 | 4.44 | 30.00 | 93.00  | 152.21 | 2.33 | 16.00 | 2 |
| <i>Pelodera</i> \$        | 4.00  | 1.48 | 10.00 | 51.00  | 83.47  | 1.28 | 6.00  | 1 |

|                       |       |      |       |        |        |      |       |   |
|-----------------------|-------|------|-------|--------|--------|------|-------|---|
| <i>Protorhabditis</i> | 9.00  | 3.33 | 22.50 | 85.00  | 139.12 | 2.13 | 11.00 | 1 |
| <b>Omnivores</b>      |       |      |       |        |        |      |       |   |
| <i>Eudorylaimus</i>   | 9.00  | 3.33 | 22.50 | 98.00  | 160.39 | 2.45 | 11.00 | 4 |
| <i>Dorylaimus*</i>    | 10.00 | 3.70 | 25.00 | 103.00 | 168.58 | 2.58 | 18.00 | 4 |
| <i>Mesodorylaimus</i> | 8.00  | 2.96 | 20.00 | 78.00  | 127.66 | 1.95 | 10.00 | 4 |
| <i>Discolaimius</i>   | 7.00  | 2.59 | 17.50 | 69.00  | 112.93 | 1.73 | 9.00  | 5 |
| <b>Predatory</b>      |       |      |       |        |        |      |       |   |
| <i>Mononchus</i>      | 9.00  | 3.33 | 22.50 | 85.00  | 139.12 | 2.13 | 13.00 | 1 |
| <i>Mylonchulus</i> \$ | 0.00  | 0.00 | 0.00  | 0.00   | 0.00   | 0.00 | 0.00  | 0 |
| <i>Prionchulus</i>    | 7.00  | 2.59 | 17.50 | 65.00  | 106.38 | 1.63 | 9.00  | 4 |
| <i>Clarkus</i>        | 1.00  | 0.37 | 2.50  | 12.00  | 19.64  | 0.30 | 4.00  | 1 |
| <i>Miconchulus</i>    | 6.00  | 2.22 | 15.00 | 71.00  | 116.20 | 1.78 | 8.00  | 4 |
| <b>Fungivores</b>     |       |      |       |        |        |      |       |   |
| <i>Dorylaimellus</i>  | 8.00  | 2.96 | 20.00 | 76.00  | 124.39 | 1.90 | 14.00 | 4 |
| <i>Dorylaimoides*</i> | 12.00 | 4.44 | 30.00 | 94.00  | 153.85 | 2.35 | 15.00 | 4 |
| <i>Tylencholaimus</i> | 2.00  | 0.74 | 5.00  | 27.00  | 44.19  | 0.68 | 5.00  | 1 |
| <i>Aphelenchus</i>    | 0.00  | 0.00 | 0.00  | 0.00   | 0.00   | 0.00 | 0.00  | 0 |
| <i>Aphelenchoides</i> | 5.00  | 1.85 | 12.50 | 57.00  | 93.29  | 1.43 | 9.00  | 2 |

Data is represented in mean values of each diversity trait. The nematode genera which were with higher density and frequency values are denoted with asterisk (\*) and which lost persistence at flood irrigation are denoted with dollar (\$).

#### B. During plantation (season II)

| Nematode genera          | Frequency | Relative frequency | Absolute frequency | Density | Relative density | Mean density | Nematode no. | c-p values |
|--------------------------|-----------|--------------------|--------------------|---------|------------------|--------------|--------------|------------|
| <b>Plant-parasitic</b>   |           |                    |                    |         |                  |              |              |            |
| <i>Psilenchus</i>        | 16.00     | 3.71               | 40.00              | 110.00  | 131.03           | 2.75         | 12.00        | 2          |
| <i>Radopholus</i>        | 13.00     | 3.02               | 32.50              | 100.00  | 119.12           | 2.50         | 13.00        | 2          |
| <i>Longidorus</i> *      | 18.00     | 4.18               | 45.00              | 120.00  | 142.94           | 3.00         | 16.00        | 5          |
| <i>Rotylenchus</i>       | 9.00      | 2.09               | 22.50              | 88.00   | 104.82           | 2.20         | 12.00        | 1          |
| <i>Criconemoides</i> \$  | 0.00      | 0.00               | 0.00               | 0.00    | 0.00             | 0.00         | 0.00         | 0          |
| <i>Ditylenchus</i>       | 19.00     | 4.41               | 47.50              | 130.00  | 154.85           | 3.25         | 20.00        | 2          |
| <i>Meloidogyne</i> *     | 20.00     | 4.64               | 50.00              | 137.00  | 163.19           | 3.43         | 14.00        | 3          |
| <i>Helicotylenchus</i>   | 14.00     | 3.25               | 35.00              | 95.00   | 113.16           | 2.38         | 9.00         | 3          |
| <i>Heterodera</i> *      | 16.00     | 3.71               | 40.00              | 102.00  | 121.50           | 2.55         | 14.00        | 3          |
| <i>Hirschmanniella</i> * | 23.00     | 5.34               | 57.50              | 117.00  | 139.37           | 2.93         | 21.00        | 3          |
| <i>Hoplolaimus</i>       | 12.00     | 2.78               | 30.00              | 98.00   | 116.74           | 2.45         | 16.00        | 1          |
| <i>Globodera</i>         | 11.00     | 2.55               | 27.50              | 88.00   | 104.82           | 2.20         | 8.00         | 3          |
| <i>Tylenchus</i> *       | 20.00     | 4.64               | 50.00              | 96.00   | 114.35           | 2.40         | 19.00        | 2          |

|                          |       |      |       |        |        |      |       |   |
|--------------------------|-------|------|-------|--------|--------|------|-------|---|
| <i>Paratylenchus</i>     | 21.00 | 4.87 | 52.50 | 123.00 | 146.52 | 3.08 | 17.00 | 1 |
| <i>Pratylenchus</i>      | 17.00 | 3.94 | 42.50 | 104.00 | 123.88 | 2.60 | 16.00 | 3 |
| <i>Hexatylenchus</i>     | 9.00  | 2.09 | 22.50 | 83.00  | 98.87  | 2.08 | 11.00 | 2 |
| <i>Tylenchorhynchus</i>  | 4.00  | 0.93 | 10.00 | 46.00  | 54.79  | 1.15 | 5.00  | 2 |
| <i>Xiphinema</i>         | 3.00  | 0.70 | 7.50  | 28.00  | 33.35  | 0.70 | 8.00  | 1 |
| <b>Bacteriovores</b>     |       |      |       |        |        |      |       |   |
| <i>Acrobelus</i>         | 11.00 | 2.55 | 27.50 | 100.00 | 119.12 | 2.50 | 8.00  | 2 |
| <i>Cephalobus*</i>       | 9.00  | 2.09 | 22.50 | 95.00  | 113.16 | 2.38 | 7.00  | 2 |
| <i>Eucephalobus</i>      | 5.00  | 1.16 | 12.50 | 55.00  | 65.52  | 1.38 | 9.00  | 2 |
| <i>Rhabdolaimus\$</i>    | 0.00  | 0.00 | 0.00  | 0.00   | 0.00   | 0.00 | 0.00  | 0 |
| <i>Diplogaster</i>       | 8.00  | 1.86 | 20.00 | 77.00  | 91.72  | 1.93 | 11.00 | 1 |
| <i>Diploscapter</i>      | 6.00  | 1.39 | 15.00 | 65.00  | 77.43  | 1.63 | 14.00 | 1 |
| <i>Rhabditis</i>         | 7.00  | 1.62 | 17.50 | 73.00  | 86.96  | 1.83 | 9.00  | 1 |
| <i>Teratorhabditis\$</i> | 0.00  | 0.00 | 0.00  | 0.00   | 0.00   | 0.00 | 0.00  | 0 |
| <i>Mesorhabditis</i>     | 9.00  | 2.09 | 22.50 | 85.00  | 101.25 | 2.13 | 16.00 | 1 |
| <i>Cuticularia*</i>      | 7.00  | 1.62 | 17.50 | 76.00  | 90.53  | 1.90 | 19.00 | 2 |
| <i>Pelodera\$</i>        | 0.00  | 0.00 | 0.00  | 0.00   | 0.00   | 0.00 | 0.00  | 0 |
| <i>Protorhabditis</i>    | 5.00  | 1.16 | 12.50 | 62.00  | 73.85  | 1.55 | 13.00 | 1 |

|                        |       |      |       |        |        |      |       |   |
|------------------------|-------|------|-------|--------|--------|------|-------|---|
| <b>Omnivores</b>       |       |      |       |        |        |      |       |   |
| <i>Eudorylaimus</i>    | 9.00  | 2.09 | 22.50 | 99.00  | 117.93 | 2.48 | 9.00  | 4 |
| <i>Dorylaimus</i> *    | 11.00 | 2.55 | 27.50 | 103.00 | 122.69 | 2.58 | 17.00 | 4 |
| <i>Mesodorylaimus</i>  | 13.00 | 3.02 | 32.50 | 109.00 | 129.84 | 2.73 | 13.00 | 4 |
| <i>Discolaimius</i>    | 7.00  | 1.62 | 17.50 | 87.00  | 103.63 | 2.18 | 8.00  | 5 |
| <b>Predatory</b>       |       |      |       |        |        |      |       |   |
| <i>Mononchus</i>       | 8.00  | 1.86 | 20.00 | 40.00  | 47.65  | 1.00 | 7.00  | 1 |
| <i>Mylonchulus</i> \$  | 0.00  | 0.00 | 0.00  | 0.00   | 0.00   | 0.00 | 0.00  | 0 |
| <i>Prionchulus</i>     | 4.00  | 0.93 | 10.00 | 22.00  | 26.21  | 0.55 | 3.00  | 4 |
| <i>Clarkus</i>         | 3.00  | 0.70 | 7.50  | 31.00  | 36.93  | 0.78 | 4.00  | 1 |
| <i>Miconchulus</i>     | 2.00  | 0.46 | 5.00  | 14.00  | 16.68  | 0.35 | 5.00  | 4 |
| <b>Fungivores</b>      |       |      |       |        |        |      |       |   |
| <i>Dorylaimellus</i>   | 12.00 | 2.78 | 30.00 | 97.00  | 115.54 | 2.43 | 12.00 | 4 |
| <i>Dorylaimoides</i> * | 15.00 | 3.48 | 37.50 | 109.00 | 129.84 | 2.73 | 9.00  | 4 |
| <i>Tylencholaimus</i>  | 8.00  | 1.86 | 20.00 | 86.00  | 102.44 | 2.15 | 8.00  | 1 |
| <i>Aphelenchus</i>     | 14.00 | 3.25 | 35.00 | 108.00 | 128.65 | 2.70 | 10.00 | 2 |
| <i>Aphelenchoides</i>  | 13.00 | 3.02 | 32.50 | 100.00 | 119.12 | 2.50 | 11.00 | 2 |

Data is represented in mean values of each diversity trait. The nematode genera which were with higher density and frequency values are denoted with asterisk (\*) and which lost persistence at flood irrigation are denoted with dollar (\$).

**C. After harvesting (season III)**

| <b>Nematode genera</b>  | <b>Frequency</b> | <b>Relative frequency</b> | <b>Absolute frequency</b> | <b>Density</b> | <b>Relative density</b> | <b>Mean density</b> | <b>Nematode no.</b> | <b>c-p values</b> |
|-------------------------|------------------|---------------------------|---------------------------|----------------|-------------------------|---------------------|---------------------|-------------------|
| <b>Plant-parasitic</b>  |                  |                           |                           |                |                         |                     |                     |                   |
| <i>Psilenchus</i>       | 0.00             | 0.00                      | 0.00                      | 0.00           | 0.00                    | 0.00                | 0.00                | 0                 |
| <i>Radopholus</i>       | 0.00             | 0.00                      | 0.00                      | 0.00           | 0.00                    | 0.00                | 0.00                | 0                 |
| <i>Longidorus*</i>      | 12.00            | 3.11                      | 30.00                     | 104.00         | 137.16                  | 2.60                | 9.00                | 5                 |
| <i>Rotylenchus</i>      | 9.00             | 2.33                      | 22.50                     | 83.00          | 109.47                  | 2.08                | 10.00               | 1                 |
| <i>Criconemoides</i> \$ | 0.00             | 0.00                      | 0.00                      | 0.00           | 0.00                    | 0.00                | 0.00                | 0                 |
| <i>Ditylenchus</i>      | 9.00             | 2.33                      | 22.50                     | 78.00          | 102.88                  | 1.95                | 13.00               | 2                 |
| <i>Meloidogyne*</i>     | 12.00            | 3.11                      | 30.00                     | 89.00          | 117.38                  | 2.23                | 7.00                | 3                 |
| <i>Helicotylenchus</i>  | 0.00             | 0.00                      | 0.00                      | 0.00           | 0.00                    | 0.00                | 0.00                | 0                 |
| <i>Heterodera*</i>      | 14.00            | 3.63                      | 35.00                     | 107.00         | 141.12                  | 2.68                | 9.00                | 3                 |
| <i>Hirschmanniella*</i> | 17.00            | 4.40                      | 42.50                     | 113.00         | 149.04                  | 2.83                | 10.00               | 3                 |
| <i>Hoplolaimus</i>      | 0.00             | 0.00                      | 0.00                      | 0.00           | 0.00                    | 0.00                | 0.00                | 0                 |
| <i>Globodera</i>        | 9.00             | 2.33                      | 22.50                     | 75.00          | 98.92                   | 1.88                | 6.00                | 3                 |
| <i>Tylenchus*</i>       | 16.00            | 4.15                      | 40.00                     | 100.00         | 131.89                  | 2.50                | 11.00               | 2                 |
| <i>Paratylenchus</i>    | 15.00            | 3.89                      | 37.50                     | 88.00          | 116.06                  | 2.20                | 10.00               | 1                 |
| <i>Pratylenchus</i>     | 13.00            | 3.37                      | 32.50                     | 78.00          | 102.88                  | 1.95                | 8.00                | 3                 |



|                           |       |      |       |        |        |      |       |   |
|---------------------------|-------|------|-------|--------|--------|------|-------|---|
| <i>Hexatylenchus</i>      | 7.00  | 1.81 | 17.50 | 55.00  | 72.54  | 1.38 | 7.00  | 2 |
| <i>Tylenchorhynchus</i>   | 0.00  | 0.00 | 0.00  | 0.00   | 0.00   | 0.00 | 0.00  | 0 |
| <i>Xiphinema</i>          | 0.00  | 0.00 | 0.00  | 0.00   | 0.00   | 0.00 | 0.00  | 0 |
| <b>Bacteriovores</b>      |       |      |       |        |        |      |       |   |
| <i>Acrobelus</i>          | 16.00 | 4.15 | 40.00 | 112.00 | 147.72 | 2.80 | 5.00  | 2 |
| <i>Cephalobus</i> *       | 17.00 | 4.40 | 42.50 | 115.00 | 151.68 | 2.88 | 10.00 | 2 |
| <i>Eucephalobus</i>       | 11.00 | 2.85 | 27.50 | 98.00  | 129.25 | 2.45 | 9.00  | 2 |
| <i>Rhabdolaimus</i> \$    | 9.00  | 2.33 | 22.50 | 94.00  | 123.98 | 2.35 | 11.00 | 1 |
| <i>Diplogaster</i>        | 14.00 | 3.63 | 35.00 | 109.00 | 143.76 | 2.73 | 14.00 | 1 |
| <i>Diploscapter</i>       | 8.00  | 2.07 | 20.00 | 78.00  | 102.88 | 1.95 | 10.00 | 1 |
| <i>Rhabditis</i>          | 11.00 | 2.85 | 27.50 | 97.00  | 127.93 | 2.43 | 13.00 | 1 |
| <i>Teratorhabditis</i> \$ | 7.00  | 1.81 | 17.50 | 75.00  | 98.92  | 1.88 | 15.00 | 1 |
| <i>Mesorhabditis</i>      | 13.00 | 3.37 | 32.50 | 100.00 | 131.89 | 2.50 | 9.00  | 1 |
| <i>Cuticularia</i> *      | 15.00 | 3.89 | 37.50 | 109.00 | 143.76 | 2.73 | 17.00 | 2 |
| <i>Pelodera</i> \$        | 10.00 | 2.59 | 25.00 | 91.00  | 120.02 | 2.28 | 7.00  | 1 |
| <i>Protorhabditis</i>     | 14.00 | 3.63 | 35.00 | 115.00 | 151.68 | 2.88 | 18.00 | 1 |
| <b>Omnivores</b>          |       |      |       |        |        |      |       |   |
| <i>Eudorylaimus</i>       | 7.00  | 1.81 | 17.50 | 65.00  | 85.73  | 1.63 | 9.00  | 4 |

|                       |       |      |       |        |        |      |       |   |
|-----------------------|-------|------|-------|--------|--------|------|-------|---|
| <i>Dorylaimus*</i>    | 9.00  | 2.33 | 22.50 | 85.00  | 112.11 | 2.13 | 10.00 | 4 |
| <i>Mesodorylaimus</i> | 0.00  | 0.00 | 0.00  | 0.00   | 0.00   | 0.00 | 0.00  | 0 |
| <i>Discolaimius</i>   | 5.00  | 1.30 | 12.50 | 54.00  | 71.22  | 1.35 | 8.00  | 5 |
| <b>Predatory</b>      |       |      |       |        |        |      |       |   |
| <i>Mononchus</i>      | 7.00  | 1.81 | 17.50 | 55.00  | 72.54  | 1.38 | 8.00  | 1 |
| <i>Mylonchulus</i> \$ | 5.00  | 1.30 | 12.50 | 45.00  | 59.35  | 1.13 | 9.00  | 5 |
| <i>Prionchulus</i>    | 4.00  | 1.04 | 10.00 | 35.00  | 46.16  | 0.88 | 8.00  | 4 |
| <i>Clarkus</i>        | 0.00  | 0.00 | 0.00  | 0.00   | 0.00   | 0.00 | 0.00  | 0 |
| <i>Miconchulus</i>    | 0.00  | 0.00 | 0.00  | 0.00   | 0.00   | 0.00 | 0.00  | 0 |
| <b>Fungivores</b>     |       |      |       |        |        |      |       |   |
| <i>Dorylaimellus</i>  | 10.00 | 2.59 | 25.00 | 96.00  | 126.62 | 2.40 | 15.00 | 4 |
| <i>Dorylaimoides*</i> | 18.00 | 4.66 | 45.00 | 116.00 | 152.99 | 2.90 | 16.00 | 4 |
| <i>Tylencholaimus</i> | 15.00 | 3.89 | 37.50 | 109.00 | 143.76 | 2.73 | 11.00 | 1 |
| <i>Aphelenchus</i>    | 16.00 | 4.15 | 40.00 | 112.00 | 147.72 | 2.80 | 15.00 | 2 |
| <i>Aphelenchoides</i> | 12.00 | 3.11 | 30.00 | 98.00  | 129.25 | 2.45 | 14.00 | 2 |

Data is represented in mean values of each diversity trait. The nematode genera which were with higher density and frequency values are denoted with asterisk (\*) and which lost persistence at flood irrigation are denoted with dollar (\$).
